# Supplementary material
Source: Springer Nature journal article supplement (https://www.springermedizin.de/resource/supplementary/12879_2007_640_MOESM1_ESM.pdf/9449404)

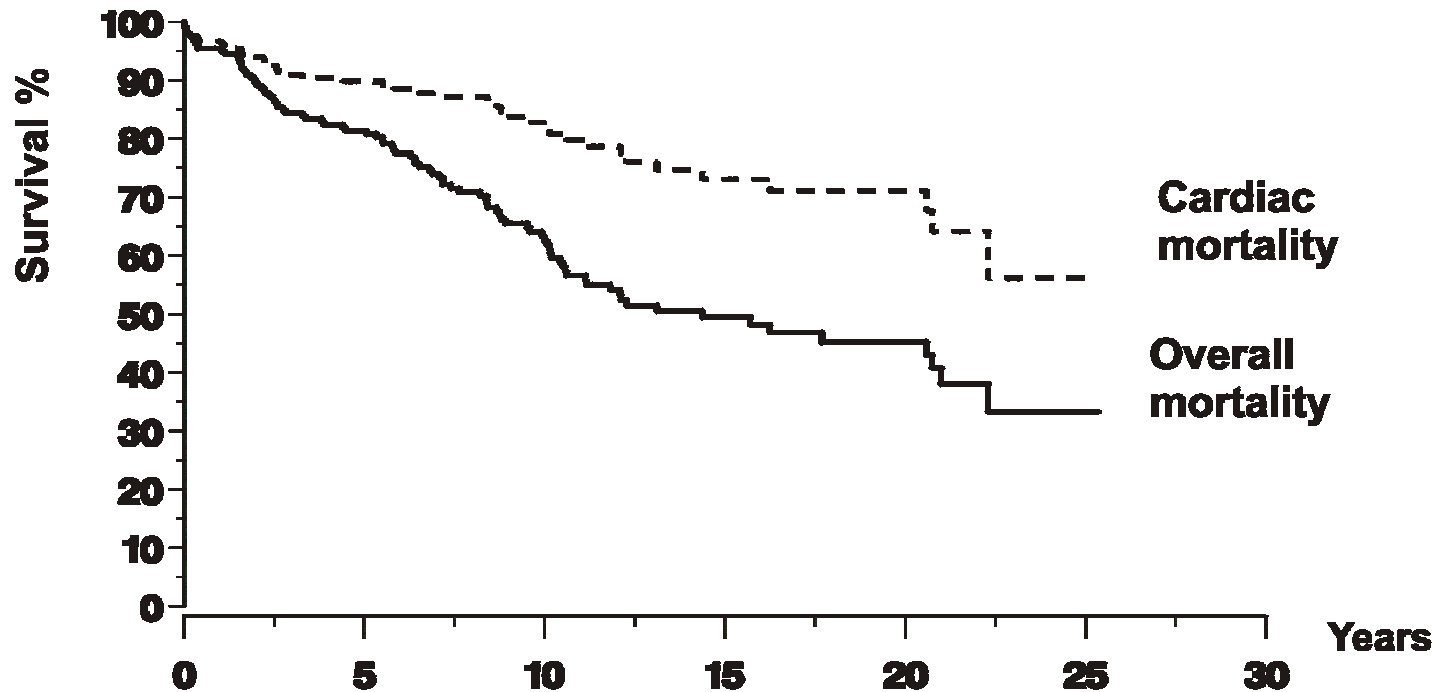

**Cardiac mortality (n)**

**243**

**152**

**84**

**43**

**24**

**1**

**Overall mortality (n)**

**243**

**152**

**84**

**43**

**24**

**1**

Supplement: MOESM1 [file 9449404]
